# Supplementary material
Source: MDPI journal article supplement (https://www.mdpi.com/1424-8247/14/12/1205)
Supplement: s1 [file s1]

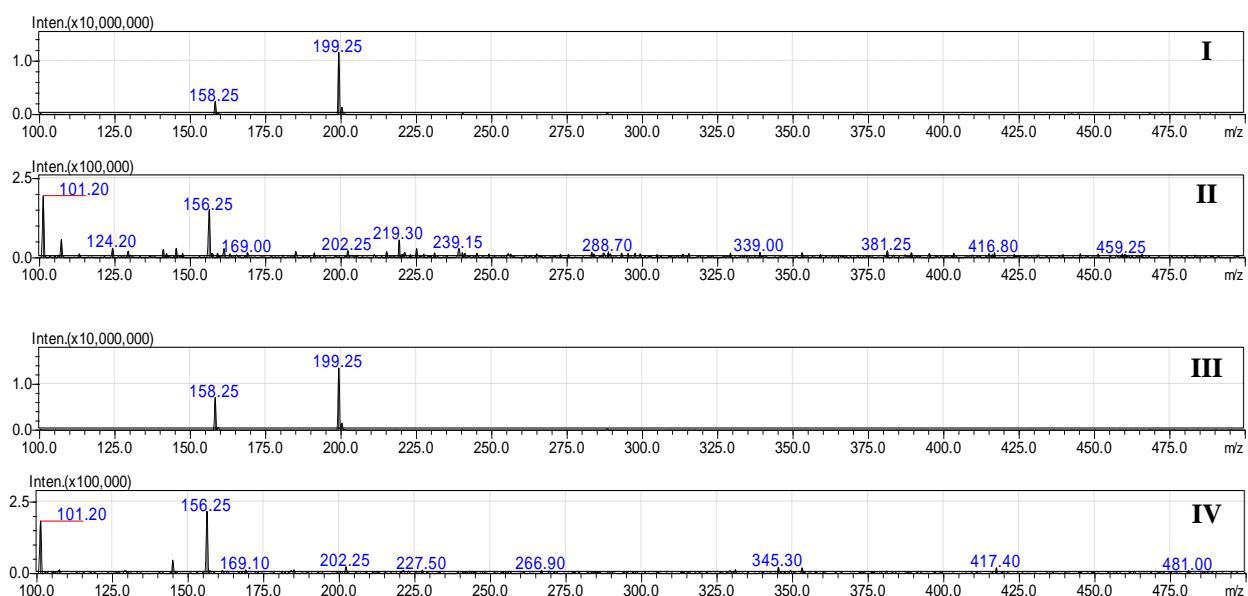

**Figure S1.** ESI-MS Scan spectra obtained for TXA in positive (I and III) and negative (II and IV) ionization modes, using acetonitrile-aqueous ammonium bicarbonate (pH 7.4; 10 mM) (80:20, v/v) (I and II) or acetonitrile-aqueous ammonium bicarbonate (pH 7.4; 10 mM) (50:50, v/v) (III and IV) as mobile phase.

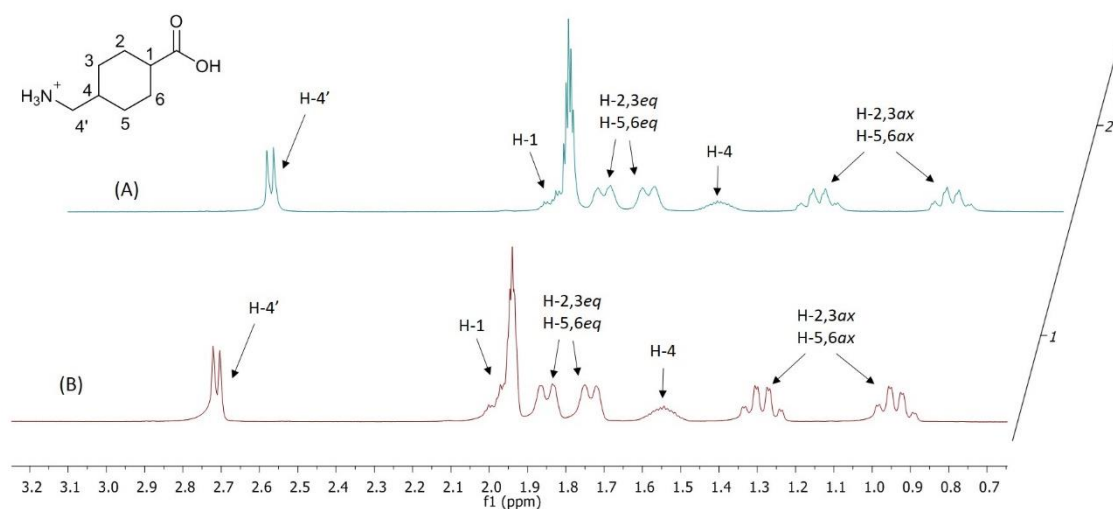

**Figure S2.** The  $^1\text{H}$  NMR of TXA were recorded on a BRUKER AVANCE III 400 MHz, 9.4 Tesla at 400.14 MHz, using tetramethylsilane as internal reference and a mixture of deuterated solvents composed by  $\text{CD}_3\text{CN}/\text{D}_2\text{O}$  (75:25, v/v) (A) in the absence or (B) presence of  $\text{Na}_2\text{CO}_3$  additive.
